# Supplementary material
Source: PubMed Central journal article supplement (PMC4974068)
Supplement: mmc1.pdf [file mmc1.pdf]

**The American Journal of Human Genetics, Volume 99**

**Supplemental Data**

**Heterozygous Mutations in *MAP3K7*,  
Encoding TGF- $\beta$ -Activated Kinase 1,  
Cause Cardiospondylocarpofacial Syndrome**

**Carine Le Goff, Curtis Rogers, Wilfried Le Goff, Graziella Pinto, Damien Bonnet, Maya Chrabieh, Olivier Alibeu, Patrick Nistchke, Arnold Munnich, Capucine Picard, and Valérie Cormier-Daire**

|        | Coverage | Reads depth (15x) | Reads depth (30x) | Total relevant variants | Variant under dominant model     | After in house data analysis | Variant under recessive model     | After in house data analysis |
|--------|----------|-------------------|-------------------|-------------------------|----------------------------------|------------------------------|-----------------------------------|------------------------------|
| Case 1 | 42       | 57,8              | 46                | 926                     | 27<br>(clinically associated 16) | 1                            | 120<br>(clinically associated 68) | 0                            |
| Case 2 | 40       | 64                | 50                | 972                     |                                  |                              |                                   |                              |
| Case 3 | 80       | 69                | 60                | 1385                    |                                  |                              |                                   |                              |
| Case 5 | 79       | 68                | 59                | 1064                    |                                  |                              |                                   |                              |

Supplemental table 1 WES data
